# Supplementary material for: Streptococcus sputorum, a Novel Member of Streptococcus with Multidrug Resistance, Exhibits Cytotoxicity
Source: MDPI journal article supplement (doi:10.3390/antibiotics10121532), 2021-12-14
Supplement: s1 [file s1]

Table S1 Characteristics used to distinguish strain SP218 and SP219 from *S.pneumoniae* and *S.pseudopneumoniae*

| Characteristic                     | SP218 | SP219 | <i>S. pneumoniae</i> ST556 | <i>S. pseudopneumoniae</i> * |
|------------------------------------|-------|-------|----------------------------|------------------------------|
| Temperature (optimum)°C            | 37    | 37    | 37                         | 37                           |
| pH (optimum)                       | 7.2   | 7.2   | 7.2                        | 7.2                          |
| Sodium deoxycholate                | +     | +     | +                          | -                            |
| Optochin                           | +     | +     | +                          | +                            |
| Enzyme activity                    |       |       |                            |                              |
| Arginine dihydrolase               | -     | -     | -                          | -                            |
| $\beta$ -glucosidase               | -     | -     | -                          | -                            |
| $\beta$ -galactosidase             | -     | +     | -                          | -                            |
| $\beta$ -glucuronidase             | -     | -     | -                          | -                            |
| $\alpha$ -galactosidase            | +     | +     | +                          | +                            |
| Alkaline phosphatase               | -     | -     | -                          | -                            |
| Alanyl-phenylalanyl-proline        | +     | +     | +                          | -                            |
| Arylamidase                        |       |       |                            |                              |
| $\beta$ -galactosidase             | -     | -     | -                          | -                            |
| Pyroglutamic acid arylamidase      | -     | -     | -                          | -                            |
| n-acetyl- $\beta$ -glucosaminidase | -     | -     | -                          | -                            |
| Glycyl-tryptophan arylamidase      | +     | +     | +                          | -                            |
| $\beta$ -mannosidase               | -     | -     | -                          | -                            |
| Acid production                    |       |       |                            |                              |
| Ribose                             | +     | +     | -                          | -                            |
| Mannitol                           | -     | -     | -                          | W                            |
| Sorbitol                           | -     | -     | -                          | -                            |
| Lactose                            | W     | +     | W                          | +                            |
| Trehalose                          | W     | +     | +                          | -                            |
| Raffinose                          | -     | +     | +                          | -                            |
| Glycogen                           | -     | -     | -                          | -                            |
| Pullulane                          | -     | -     | -                          | -                            |
| Maltose                            | +     | +     | +                          | -                            |
| Melibiose                          | -     | -     | -                          | -                            |
| Saccharose                         | -     | -     | -                          | -                            |
| L-arabinose                        | +     | +     | +                          | -                            |
| D-arabitol                         | -     | -     | -                          | -                            |
| Melezitose                         | -     | -     | -                          | -                            |
| methyl- $\beta$ D-glucopyranoside  | -     | -     | -                          | -                            |
| Tagatose                           | -     | -     | -                          | -                            |
| Cyclode Xtrin                      | -     | -     | -                          | -                            |
| Else                               |       |       |                            |                              |
| Acetoin production                 | -     | -     | -                          | -                            |
| Hydrolysis of hippurate            | +     | +     | -                          | -                            |

\*Lim YK, Park SN, Shin JH, Chang YH, Shin Y, Paek J, Kim H, Kook JK. 2019. *Streptococcus chosunense* sp. nov., Isolated from Human Postoperative Maxillary Cyst. Curr Microbiol 76:1193-1198. <https://doi.org/10.1007/s00284-019-01746-0>

Symbols: +, positive; -, negative; w, weak.
