# Supplementary figures and images for: Streptococcus sputorum, a Novel Member of Streptococcus with Multidrug Resistance, Exhibits Cytotoxicity
Source: MDPI journal article supplement (doi:10.3390/antibiotics10121532), 2021-12-14

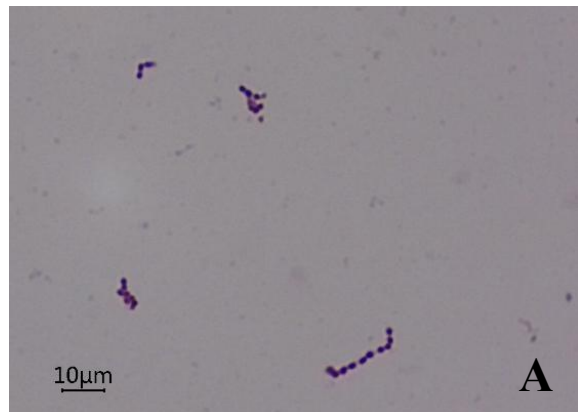

**ST556**

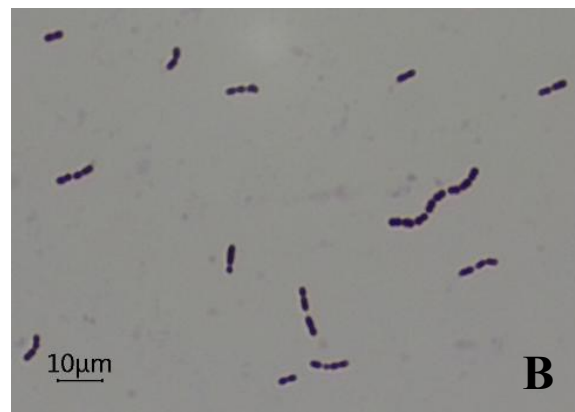

**SP218**

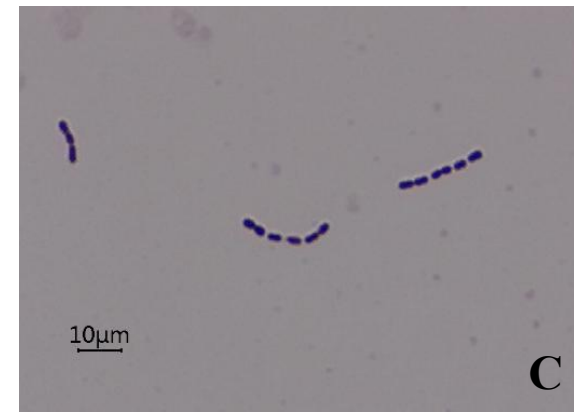

**SP219**

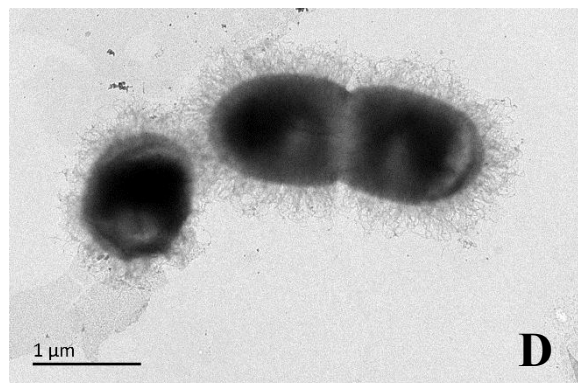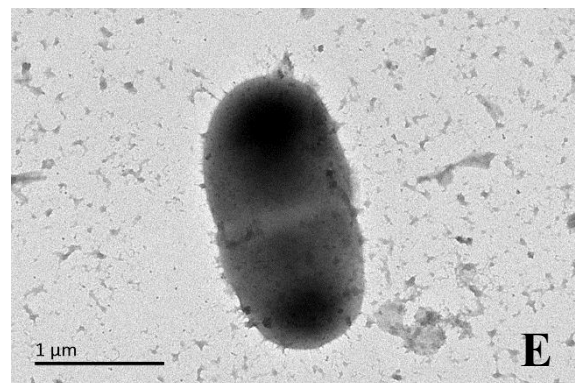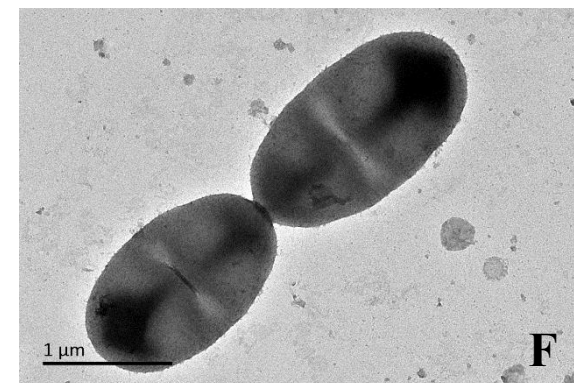

Supplement: s1 [file s1]
